# Supplementary material for: Rewiring of the promoter-enhancer interactome and regulatory landscape in glioblastoma orchestrates gene expression underlying neurogliomal synaptic communication
Source: PubMed Central journal article supplement (PMC10576091; doi:10.1038/s41467-023-41919-x), 2023-10-13
Supplement: 41467_2023_41919_MOESM9_ESM.pdf [file 41467_2023_41919_MOESM9_ESM.pdf]

## Reporting Summary

Nature Portfolio wishes to improve the reproducibility of the work that we publish. This form provides structure for consistency and transparency in reporting. For further information on Nature Portfolio policies, see our [Editorial Policies](#) and the [Editorial Policy Checklist](#).

### Statistics

For all statistical analyses, confirm that the following items are present in the figure legend, table legend, main text, or Methods section.

- |                                     |                                                                                                                                                                                                                                                                                                |
|-------------------------------------|------------------------------------------------------------------------------------------------------------------------------------------------------------------------------------------------------------------------------------------------------------------------------------------------|
| n/a                                 | Confirmed                                                                                                                                                                                                                                                                                      |
| <input type="checkbox"/>            | <input checked="" type="checkbox"/> The exact sample size ( $n$ ) for each experimental group/condition, given as a discrete number and unit of measurement                                                                                                                                    |
| <input type="checkbox"/>            | <input checked="" type="checkbox"/> A statement on whether measurements were taken from distinct samples or whether the same sample was measured repeatedly                                                                                                                                    |
| <input type="checkbox"/>            | <input checked="" type="checkbox"/> The statistical test(s) used AND whether they are one- or two-sided<br><i>Only common tests should be described solely by name; describe more complex techniques in the Methods section.</i>                                                               |
| <input checked="" type="checkbox"/> | <input type="checkbox"/> A description of all covariates tested                                                                                                                                                                                                                                |
| <input type="checkbox"/>            | <input checked="" type="checkbox"/> A description of any assumptions or corrections, such as tests of normality and adjustment for multiple comparisons                                                                                                                                        |
| <input type="checkbox"/>            | <input checked="" type="checkbox"/> A full description of the statistical parameters including central tendency (e.g. means) or other basic estimates (e.g. regression coefficient) AND variation (e.g. standard deviation) or associated estimates of uncertainty (e.g. confidence intervals) |
| <input type="checkbox"/>            | <input checked="" type="checkbox"/> For null hypothesis testing, the test statistic (e.g. $F$ , $t$ , $r$ ) with confidence intervals, effect sizes, degrees of freedom and $P$ value noted<br><i>Give <math>P</math> values as exact values whenever suitable.</i>                            |
| <input checked="" type="checkbox"/> | <input type="checkbox"/> For Bayesian analysis, information on the choice of priors and Markov chain Monte Carlo settings                                                                                                                                                                      |
| <input checked="" type="checkbox"/> | <input type="checkbox"/> For hierarchical and complex designs, identification of the appropriate level for tests and full reporting of outcomes                                                                                                                                                |
| <input type="checkbox"/>            | <input checked="" type="checkbox"/> Estimates of effect sizes (e.g. Cohen's $d$ , Pearson's $r$ ), indicating how they were calculated                                                                                                                                                         |

*Our web collection on [statistics for biologists](#) contains articles on many of the points above.*

### Software and code

Policy information about [availability of computer code](#)

Data collection

- TCGAAbiolinks (2.18.0, 2.25.3) and RTCGAToolbox (2.20.0, 2.28.4) were used to retrieve RNA-seq data available at The Cancer Genome Atlas (TCGA, <https://portal.gdc.cancer.gov/>) from both human Glioblastoma (GB, n=156) and Low-Grade Glioma (LGG, n=511) samples alongside normal tissue samples.
- Next Generation Sequencing: NovaSeq 6000 System (Illumina).
- Incucyte Base Analysis Software was used to acquire and analyze live-cell imaging data obtained with the IncuCyte S3 Live-Cell Analysis instrument (Sartorius).
- Paravision 7.0 Software was used to collect MRI data on a Bruker MR scanner.
- LAS X software was used to collect immunofluorescence images with a Leica widefield Thunder microscope, whereas NIS-Elements (F 4.60.00) software was used to acquire those on the Nikon Eclipse E800 and a microscope.
- The Human Protein Atlas resource was used to retrieve protein expression and pathological information from glioma specimens.
- FACS sorting was performed on a BD FACSAria™ III Cell Sorter instrument using the BD FACSDiva software.

Data analysis

- Publicly available tools used in this study:
- STAR (2.7.2b)
- bowtie2 (2.4.1, 2.4.5)
- samtools (1.12, 1.17)
- bedtools (2.23.0, 2.25.0, 2.26.0, 2.27.1, 2.30.0)
- deepTools (2.4.3, 2.5.1, 3.1.0, 3.3.2)
- macs2 (2.2.6)
- hichipper (0.7.3)

hicpro (v3.1.0)  
 fastqc (0.11.8, 0.11.9)  
 trimmomatic (0.39)  
 SEACR (v1.3)  
 picard (2.27.5)  
 java (sun\_jdk1.8.0\_151)

-Python (3.7.6) packages used in this study:

numpy (1.20.3)  
 pandas (1.3.3)  
 pybedtools (0.8.1)  
 sklearn (1.0)  
 seaborn (0.11.2)  
 matplotlib (3.4.3)

-Open source tools available via Bioconductor (3.11, 3.12, 3.13, 3.14, 3.15, 3.16), R environment (v.4.0.0-v.4.3.0)

DESeq2 (1.30.1, 13.38.3)  
 clusterProfiler (4.0.5, 4.6.2)  
 GenomicInteractions (1.26.0)  
 ChIPpeakAnno (3.26.4, 3.32.0)  
 ChIPseeker (1.28.3, 1.34.1)  
 ComplexHeatmap (2.6.2, 2.14.0)  
 cicrlize (0.4.15)  
 diffloops (1.20.0)  
 dplyr (1.1.3)  
 plyr (1.8.8)  
 reshape2 (1.4.4)  
 ggmisc (0.5.4-1)  
 ggpubr (0.6.0)  
 ggplot2 (3.4.3)  
 Rcirco (1.2.0)  
 rstatix (0.7.2)  
 EnsDb.Hsapiens.v86 (2.99.0)  
 BSgenome.Hsapiens.UCSC.hg38 (1.4.3, 1.44)

-HOMER (V4.119)  
 - MEMESuite (v 5.5.1)  
 -ChromHMM 1.23  
 -GraphPad Prism 9  
 -Fiji (Image J v1)

For manuscripts utilizing custom algorithms or software that are central to the research but not yet described in published literature, software must be made available to editors and reviewers. We strongly encourage code deposition in a community repository (e.g. GitHub). See the Nature Portfolio [guidelines for submitting code & software](#) for further information.

## Data

Policy information about [availability of data](#)

All manuscripts must include a [data availability statement](#). This statement should provide the following information, where applicable:

- Accession codes, unique identifiers, or web links for publicly available datasets
- A description of any restrictions on data availability
- For clinical datasets or third party data, please ensure that the statement adheres to our [policy](#)

The RNA-seq, ChIP-seq, ATAC-seq, HiChIP and CUT&RUN datasets generated in this study have been deposited in GEO (Gene Expression Omnibus) under the accession number GSE217349, including the following SubSeries:

GSE217029 - ATAC - 15 GB and Astrocytes  
 GSE217031 - H3K27ac ChIP-seq - 15 GB and Astrocytes  
 GSE217035 - H3K27me3 ChIP-seq - 15 GB and Astrocytes  
 GSE217344 - H3K4me3 ChIP-seq - 15 GB and Astrocytes  
 GSE217346 - HiChIP - 15 GB and Astrocytes  
 GSE217348 - RNA-seq - 15 GB and Astrocytes  
 GSE234124 - ATAC - OPCs  
 GSE234125 - H3K27ac and H3K27me3 ChIP-seq - OPCs  
 GSE234126 - RNA-seq - OPCs  
 GSE234127 - CUT&RUN (SMAD3 and PITX1) - 13 GB, Astrocytes and OPCs

All sequencing data generated in this study has been mapped to the GRCh38/hg38 human genome.

The publicly available GB and LGG TCGA data was retrieved from The Cancer Genome Atlas (TCGA) data portal (<https://portal.gdc.cancer.gov/>).

## Human research participants

Policy information about [studies involving human research participants and Sex and Gender in Research](#).

Reporting on sex and gender

N/A

Population characteristics

N/A

Recruitment

N/A

Ethics oversight

N/A

Note that full information on the approval of the study protocol must also be provided in the manuscript.

## Field-specific reporting

Please select the one below that is the best fit for your research. If you are not sure, read the appropriate sections before making your selection.

Life sciences  Behavioural & social sciences  Ecological, evolutionary & environmental sciences

For a reference copy of the document with all sections, see [nature.com/documents/nr-reporting-summary-flat.pdf](https://nature.com/documents/nr-reporting-summary-flat.pdf)

## Life sciences study design

All studies must disclose on these points even when the disclosure is negative.

Sample size

15 patient-derived glioblastoma cell lines, one primary line of normal human astrocytes and oligodendrocyte progenitor cells (OPCs) were used in this study for RNA-seq, ChIP-seq, ATAC-seq, HiChIP and CUT&RUN. No statistical methods were used to predetermine sample size. The number of glioblastoma cell lines was chosen to represent all four GB subtypes (mesenchymal, classical, pro-neural and neural), keeping the proportions of their incidence in the human population and including 2-5 cell lines per GB subtype.

Data exclusions

All the RNA-seq, ATAC-seq, ChIP-seq, CUT&RUN and HiChIP data generated in the glioblastoma lines, the normal human astrocytes and the OPCs was included in this study, with the sole exception of the HiChIP in the U3047 line which was excluded from the analysis since it did not reach the standard quality criteria after sequencing and loop calling.

Replication

For each and all of the 15 glioblastoma lines, the normal human astrocytes and OPCs, we performed: a) RNA-seq in duplicates and sequenced ~50 million reads (PE150) per sample, b) ChIP-seq, ATAC-seq and HiChIP in single replicas and sequenced ~50, ~60 and ~100 million reads (PE150), respectively. For details on the number of reads per sample, please refer to Supplementary Tables S1-3. CUT&RUN for SMAD3 and PITX1 was performed in 13 glioblastoma lines, astrocytes and OPCs in single replicas and sequenced ~7 million reads (PE150). Live-cell imaging experiments consist of 6-8 technical replicates per condition and time-point. These were performed at two different time-points in the induction protocol and using neurons generated in two independent reprogramming experiments. In vivo experiments were performed in n=4-5 mice per group in longitudinal studies where MRI images were acquired weekly at 5 time-points between weeks 4 and 8 after tumour induction. All the attempts at data replication were successful.

Randomization

Randomization is not relevant to most of our study since we apply omics approaches to each and all of the glioblastoma cell lines alongside normal astrocytes and OPCs as controls. Randomization was performed in the in vivo studies, where mice were assigned randomly to the control and treatment groups i.e., vehicle-treated and SIS3-treated groups, respectively.

Blinding

The investigator performing live-cell imaging analysis was blinded to group allocation during data collection and image analysis. For in vivo experiments, the investigator was not blinded to groups since the data was acquired and analyzed by the same person.

## Reporting for specific materials, systems and methods

We require information from authors about some types of materials, experimental systems and methods used in many studies. Here, indicate whether each material, system or method listed is relevant to your study. If you are not sure if a list item applies to your research, read the appropriate section before selecting a response.

## Materials &amp; experimental systems

|                                     |                                                                 |
|-------------------------------------|-----------------------------------------------------------------|
| n/a                                 | Involved in the study                                           |
| <input type="checkbox"/>            | <input checked="" type="checkbox"/> Antibodies                  |
| <input type="checkbox"/>            | <input checked="" type="checkbox"/> Eukaryotic cell lines       |
| <input checked="" type="checkbox"/> | <input type="checkbox"/> Palaeontology and archaeology          |
| <input type="checkbox"/>            | <input checked="" type="checkbox"/> Animals and other organisms |
| <input checked="" type="checkbox"/> | <input type="checkbox"/> Clinical data                          |
| <input checked="" type="checkbox"/> | <input type="checkbox"/> Dual use research of concern           |

## Methods

|                                     |                                                            |
|-------------------------------------|------------------------------------------------------------|
| n/a                                 | Involved in the study                                      |
| <input type="checkbox"/>            | <input checked="" type="checkbox"/> ChIP-seq               |
| <input checked="" type="checkbox"/> | <input type="checkbox"/> Flow cytometry                    |
| <input type="checkbox"/>            | <input checked="" type="checkbox"/> MRI-based neuroimaging |

## Antibodies

## Antibodies used

| Antibody Source ID                               | Application                        | Dilution     | Lot #             | Clonality     | Clone number        |
|--------------------------------------------------|------------------------------------|--------------|-------------------|---------------|---------------------|
| H3K27ac Abcam ab4729                             | ChIP-seq                           | 4ug-         | Lot# GR3251520-1  | Rabbit        | polyclonal          |
| H3K27me3 Abcam ab192985                          | ChIP-seq                           | 4ug -        | Lot# GR3204355-11 | Rabbit        | monoclonal EPR18607 |
| H3K4me3 Abcam ab8580                             | ChIP-seq                           | 4ug -        | Lot# GR3362386-2  | Rabbit        | polyclonal          |
| H3K4me3 Abcam ab8580                             | HiChIP                             | 4ug -        | Lot# GR3362386-2  | Rabbit        | polyclonal          |
| SMAD3 Abcam ab208182                             | CUT&RUN                            | 1.2ug -      | Lot# GR3395943-9  | Rabbit        | monoclonal EPR19686 |
| PITX1 Santa Cruz sc-271435                       | CUT&RUN                            | 4ug -        | Lot# KO121        | Mouse         | monoclonal G-4      |
| Beta III tubulin Abcam ab18207                   | IF                                 | 1:1000 -     | Lot# GR3430488-1  | Rabbit        | polyclonal          |
| SMAD3 Abcam ab208182                             | IF                                 | 1:500 -      | Lot# GR3395943-9  | Rabbit        | monoclonal EPR19686 |
| PITX1 Santa Cruz sc-271435                       | IF                                 | 1:200 -      | Lot# KO121        | Mouse         | monoclonal G-4      |
| TNIK Abcam ab224252                              | IF                                 | 2ug/ml -     | Lot# 1016345-1    | Rabbit        | polyclonal          |
| EPHB3 Abcam ab133742                             | IF                                 | 1:150 -      | Lot# 1002215-1    | Rabbit        | monoclonal EPR8280  |
| KCNE4 Abcam ab254642                             | IF                                 | 2ug/ml -     | Lot# 1039028-1    | Rabbit        | polyclonal          |
| Goat anti-rabbit AF594                           | Invitrogen A32740                  | IF           | 1:500 -           | Lot# WK333741 | Polyclonal          |
| Goat anti-mouse AF488                            | Invitrogen A32723TR                | IF           | 1:500 -           | Lot# VE306232 | Polyclonal          |
| SMAD3 Abcam ab208182                             | Western-Blot                       | 1:1000 -     | Lot# GR3395943-9  | Rabbit        | polyclonal          |
| PITX1 Thermo Fisher A300-577A-T                  | Western-Blot                       | 1:1000 -     | Lot# 2            | Rabbit        | polyclonal          |
| TNIK Abcam ab224252                              | Western-Blot                       | 1:1000 -     | Lot# 1016345-1    | Rabbit        | polyclonal          |
| EPHB3 Abcam ab133742                             | Western-Blot                       | 1:1000 -     | Lot# 1002215-1    | Rabbit        | monoclonal EPR8280  |
| GAPDH Cell Signaling #14C10                      | Western-Blot                       | 1:1000 -     | Lot# 14           | Rabbit        | polyclonal          |
| Histone H3 Abcam ab176842                        | Western-Blot                       | 1:8000 -     | Lot# 1000615-6    | Rabbit        | monoclonal 14C10    |
| Peroxidase AffiniPure Goat Anti-Rabbit IgG (H+L) | Jackson ImmunoResearch 111-035-003 | Western-Blot | 1:10000 -         | Lot# 104122   | Monoclonal EPR16987 |

## Validation

H3K27ac (Abcam ab4729, ChIP-grade antibody): <https://www.abcam.com/histone-h3-acetyl-k27-antibody-chip-grade-ab4729.html>

H3K27me3 (Abcam ab192985, ChIP-grade antibody): <https://www.abcam.com/histone-h3-tri-methyl-k27-antibody-epr18607-chip-grade-ab192985.html>

H3K4me3 (Abcam ab8580, ChIP-grade antibody): <https://www.abcam.com/histone-h3-tri-methyl-k4-antibody-chip-grade-ab8580.html>

SMAD3 (Abcam ab208182, ChIP-grade antibody, KO validated): <https://www.abcam.com/products/primary-antibodies/smad3-antibody-epr19686-chip-grade-ab208182.html>

Beta III tubulin (Abcam ab18207, KO validated): <https://www.abcam.com/beta-iii-tubulin-antibody-neuronal-marker-ab18207.html>

TNIK Abcam ab224252 (Abpromise guarantee for use in tested applications: IF): <https://www.abcam.com/products/primary-antibodies/tnik-antibody-ab224252.html>

EPHB3 Abcam ab133742 (Abpromise guarantee for use in tested applications: IF and WB): <https://www.abcam.com/products/primary-antibodies/eph-receptor-b3-antibody-epr8280-ab133742.html>

KCNE4 Abcam ab254642 (Abpromise guarantee for use in tested applications: IF and WB): <https://www.abcam.com/products/primary-antibodies/kcne4-antibody-ab254642.html>

SMAD3 and PITX1 antibodies were also validated in our own knockdown and overexpression experiments.

## Eukaryotic cell lines

Policy information about [cell lines and Sex and Gender in Research](#)

## Cell line source(s)

- The following human glioblastoma cell lines (n=15) were obtained through the Human Glioblastoma Cell Culture (HGCC) resource (Uppsala University, Sweden, <https://www.hgcc.se/>): U3008, U3009, U3013, U3028, U3031, U3039, U3042, U3047, U3054, U3073, U3078, U3085, U3086, U3118, U3121. Of those, n=5 classical, n=5 mesenchymal, n=3 pro-neural and n=2 neural subtype.
- Normal Human Astrocytes (NHAs): Lonza (CC-2565)
- Human iPSC-Derived Glutamatergic Neurons (ioGlutamatergic Neurons): Abcam (ab259259)
- OPCs: iNeuTM human oligodendrocyte progenitor cells (OPCs): Creative Biolabs NeuroS (NCL-2103-P49)
- U251 (glioblastoma cell line): Sigma (09063001-1VL)

## Authentication

- The 15 glioblastoma lines were obtained directly from HGCC, a resource that provides newly established and characterized

GB cell lines from GB patient surgical samples. The resource characterizes the lines in terms of gene expression, copy number and subtype classification, among others.

- Normal Human Astrocytes (NHAs): certificate of analysis provided by Lonza for each lot.
- iPSC-derived Glutamatergic Neurons: characterized by the expression of glutamate transporter genes VGLUT1 and VGLUT2 and markers FOXP1 and TBR1 (RNA-seq, at Abcam).
- OPCs (oligodendrocyte progenitor cells): characterized by standard morphological examination and immunocytochemical methods for known marker proteins (such as O4, PDGFalphaR, NG2 and CNPase) at Creative Biolabs NeuroS.
- U251 (glioblastoma cell line): authenticated by Sigma by STR-PCR profiling.

Mycoplasma contamination

All cell lines tested negative for mycoplasma using the MycoAlert PLUS detection kit (Lonza, LT07-703).

Commonly misidentified lines  
(See [ICLAC](#) register)

No commonly misidentified cell lines were used in the study.

## Animals and other research organisms

Policy information about [studies involving animals](#); [ARRIVE guidelines](#) recommended for reporting animal research, and [Sex and Gender in Research](#)

Laboratory animals

- Mus musculus, NSG mouse strain (NOD.Cg-Prkdcscid Il2rgtm1Wjl/SzJ).
- Mice were housed under 12:12 h light:dark cycle conditions in temperature- and humidity-controlled rooms (22 °C and 50% humidity).
- Tumour formation was induced by intracranial injection in neonatal mice (P1, P2) and tumour progression was monitored until the experiment end-point when the mice were 8 weeks old.

Wild animals

The study did not involve wild animals.

Reporting on sex

Mice of both sexes were used in this study. Tumour formation was induced by orthotopic transplantation of neonatal mice, an early time-point at which sex is not assessed, and all pups were injected to have littermate controls and representation from both sexes.

Field-collected samples

The study did not involve field-collected samples.

Ethics oversight

All experiments with laboratory animals were performed in compliance with national and institutional laws, and according to protocols approved by the Regional Ethics Committee at the Court of Appeal of Northern Norrland (ethical permit ID A29-2019 and A3-2023).

Note that full information on the approval of the study protocol must also be provided in the manuscript.

## ChIP-seq

### Data deposition

Confirm that both raw and final processed data have been deposited in a public database such as [GEO](#).

Confirm that you have deposited or provided access to graph files (e.g. BED files) for the called peaks.

Data access links

*May remain private before publication.*

<https://www.ncbi.nlm.nih.gov/geo/query/acc.cgi?acc=GSE217349>

GEO accession number GSE217349

ChIP-seq subseries GSE217031 (H3K27ac), GSE217035 (H3K27me3), GSE217344 (H3K4me3) for GB lines and astrocytes; and GSE234125 (H3K27ac, H3K27me3) for OPCs.

Files in database submission

GSM6703836 astrocytes, cells, control (H3K27Ac.ChIPseq)  
 GSM6703837 U3008, cells, GBM (H3K27Ac.ChIPseq)  
 GSM6703838 U3009, cells, GBM (H3K27Ac.ChIPseq)  
 GSM6703839 U3013, cells, GBM (H3K27Ac.ChIPseq)  
 GSM6703840 U3028, cells, GBM (H3K27Ac.ChIPseq)  
 GSM6703841 U3031, cells, GBM (H3K27Ac.ChIPseq)  
 GSM6703842 U3039, cells, GBM (H3K27Ac.ChIPseq)  
 GSM6703843 U3042, cells, GBM (H3K27Ac.ChIPseq)  
 GSM6703844 U3047, cells, GBM (H3K27Ac.ChIPseq)  
 GSM6703845 U3054, cells, GBM (H3K27Ac.ChIPseq)  
 GSM6703846 U3073, cells, GBM (H3K27Ac.ChIPseq)  
 GSM6703847 U3078, cells, GBM (H3K27Ac.ChIPseq)  
 GSM6703848 U3085, cells, GBM (H3K27Ac.ChIPseq)  
 GSM6703849 U3086, cells, GBM (H3K27Ac.ChIPseq)  
 GSM6703850 U3118, cells, GBM (H3K27Ac.ChIPseq)  
 GSM6703851 U3121, cells, GBM (H3K27Ac.ChIPseq)  
 GSM6703852 astrocytes, cells, control (input for H3K27Ac)  
 GSM6703853 classical subtypes, cells, GBM (input for H3K27Ac)  
 GSM6703854 mesenchymal subtypes, cells, GBM (input for H3K27Ac)

GSM6703855 neural and proneural subtypes, cells, GBM (input for H3K27Ac)  
 GSM6703979 astrocytes, cells, control (H3K27Me3.ChIPseq)  
 GSM6703980 U3008, cells, GBM (H3K27Me3.ChIPseq)  
 GSM6703981 U3009, cells, GBM (H3K27Me3.ChIPseq)  
 GSM6703982 U3013, cells, GBM (H3K27Me3.ChIPseq)  
 GSM6703983 U3028, cells, GBM (H3K27Me3.ChIPseq)  
 GSM6703984 U3031, cells, GBM (H3K27Me3.ChIPseq)  
 GSM6703985 U3039, cells, GBM (H3K27Me3.ChIPseq)  
 GSM6703986 U3042, cells, GBM (H3K27Me3.ChIPseq)  
 GSM6703987 U3047, cells, GBM (H3K27Me3.ChIPseq)  
 GSM6703988 U3054, cells, GBM (H3K27Me3.ChIPseq)  
 GSM6703989 U3073, cells, GBM (H3K27Me3.ChIPseq)  
 GSM6703990 U3078, cells, GBM (H3K27Me3.ChIPseq)  
 GSM6703991 U3085, cells, GBM (H3K27Me3.ChIPseq)  
 GSM6703992 U3086, cells, GBM (H3K27Me3.ChIPseq)  
 GSM6703993 U3118, cells, GBM (H3K27Me3.ChIPseq)  
 GSM6703994 U3121, cells, GBM (H3K27Me3.ChIPseq)  
 GSM6703995 astrocytes, cells, control (input for H3K27Me3)  
 GSM6703996 classical subtypes, cells, GBM (input for H3K27Me3)  
 GSM6703997 mesenchymal subtypes, cells, GBM (input for H3K27Me3)  
 GSM6703998 neural and proneural subtypes, cells, GBM (input for H3K27Me3)  
 GSM6715172 hAstro, cells, control (H3K4me3.ChIPseq)  
 GSM6715173 U3008, cells, GBM (H3K4me3.ChIPseq)  
 GSM6715174 U3009, cells, GBM (H3K4me3.ChIPseq)  
 GSM6715175 U3013, cells, GBM (H3K4me3.ChIPseq)  
 GSM6715176 U3028, cells, GBM (H3K4me3.ChIPseq)  
 GSM6715177 U3031, cells, GBM (H3K4me3.ChIPseq)  
 GSM6715178 U3039, cells, GBM (H3K4me3.ChIPseq)  
 GSM6715179 U3042, cells, GBM (H3K4me3.ChIPseq)  
 GSM6715180 U3047, cells, GBM (H3K4me3.ChIPseq)  
 GSM6715181 U3054, cells, GBM (H3K4me3.ChIPseq)  
 GSM6715182 U3073, cells, GBM (H3K4me3.ChIPseq)  
 GSM6715183 U3078, cells, GBM (H3K4me3.ChIPseq)  
 GSM6715184 U3085, cells, GBM (H3K4me3.ChIPseq)  
 GSM6715185 U3086, cells, GBM (H3K4me3.ChIPseq)  
 GSM6715186 U3118, cells, GBM (H3K4me3.ChIPseq)  
 GSM6715187 U3121, cells, GBM (H3K4me3.ChIPseq)  
 GSM6715188 hAstro, cells, control (input for H3K4me3)  
 GSM6715189 classical subtypes, cells, GBM (input for H3K4me3)  
 GSM6715190 mesenchymal subtypes, cells, GBM (input for H3K4me3)  
 GSM6715191 neural and proneural subtypes, cells, GBM (input for H3K4me3)  
 GSM7446474 OPC, cells, control (H3K27Ac ChIP)  
 GSM7446475 OPC, cells, control (H3K27Me3 ChIP)  
 GSM7446476 OPC, cells, control (input for H3K27Ac and H3K27Me3 ChIP)

Genome browser session  
 (e.g. [UCSC](#))

*Provide a link to an anonymized genome browser session for "Initial submission" and "Revised version" documents only, to enable peer review. Write "no longer applicable" for "Final submission" documents.*

## Methodology

Replicates

ChIP-seq was performed in 15 glioblastoma cell lines and normal human astrocytes in single replicas with antibodies against H3K27ac, H3K27me3 and H3K4me3. For OPCs (oligodendrocyte progenitor cells), ChIP-seq was performed for H3K27ac and H3K27me3 in single replicates.

Sequencing depth

The ChIP-seq libraries were sequenced on a NovaSeq 6000 Sequencing System (Illumina) obtaining ~54 million 150PE reads per library. Details about the total number of reads, percentage of uniquely mapped reads and number of peaks called per sample can be found in Supplementary Table S3.

Antibodies

Antibody Source ID Application Dilution  
 H3K27ac Abcam ab4729 ChIP-seq 4ug  
 H3K27me3 Abcam ab192985 ChIP-seq 4ug  
 H3K4me3 Abcam ab8580 ChIP-seq 4ug

Peak calling parameters

Peak calling was performed over input using MACS2 (options: --broad -g hs -B -q 0.05)

Data quality

Fastq files were quality-checked with FastQC (<https://www.bioinformatics.babraham.ac.uk/projects/fastqc/>) and significant enrichment over input was determined by peak calling using MACS2 at q 0.05.

Software

-Mapping (GRCh38/hg38): bowtie2 (2.4.1)  
 -Peak calling: macs2 (2.2.6)

-samtools (1.12)  
 -bedtools (2.23.0, 2.25.0, 2.26.0, 2.27.1)  
 -deepTools (2.4.3, 2.5.1, 3.1.0, 3.3.2)  
 -wiggletools (1.2, EMBL-EBI)  
 -fastqc (0.11.8)

## Magnetic resonance imaging

### Experimental design

Design type

Design specifications

Behavioral performance measures

### Acquisition

Imaging type(s)

Field strength

Sequence & imaging parameters

Area of acquisition

Diffusion MRI  Used  Not used

### Preprocessing

Preprocessing software

Normalization

Normalization template

Noise and artifact removal

Volume censoring

### Statistical modeling & inference

Model type and settings

Effect(s) tested

Specify type of analysis:  Whole brain  ROI-based  Both

Statistic type for inference   
 (See [Eklund et al. 2016](#))

Correction

### Models & analysis

n/a | Involved in the study

Functional and/or effective connectivity

Graph analysis

Multivariate modeling or predictive analysis
